# Supplementary material
Source: PubMed Central journal article supplement (PMC4136230)
Supplement: IAI.01536-14_zii999090794so1.pdf [file IAI.01536-14_zii999090794so1.pdf]

Table A1: primer sequences

| <b>Gene symbol</b>            | <b>Accession number</b> | <b>Primer sequence</b> |                        |
|-------------------------------|-------------------------|------------------------|------------------------|
| <i>Housekeeping genes (1)</i> |                         |                        |                        |
| Actb                          | NM_007393.3             | F:                     | CTTCTTTGCAGCTCCTTCGTT  |
|                               |                         | R:                     | TTCTGACCCATCCCACCA     |
| Gadph                         | NM_008084.2             | F:                     | CCTCGTCCCGTAGACAAAATG  |
|                               |                         | R:                     | TGAAGGGGTCGTTGATGGC    |
| Gusb                          | NM_010368.1             | F:                     | CCGATTATCCAGAGCGAGTATG |
|                               |                         | R:                     | CTCAGCGGTGACTGGTTCCG   |
| Hprt1                         | NM_013556.2             | F:                     | TGGATACAGGCCAGACTTTGTT |
|                               |                         | R:                     | CAGATTCAACTGCGCTCATC   |
| Rplp0                         | NM_007475.5             | F:                     | ACTGAGATTCGGGATATGCTGT |
|                               |                         | R:                     | TGCCTCTGGAGATTTTCGTG   |
| Tbp                           | NM_013684.3             | F:                     | CAAACCCAGAATTGTTCTCCTT |
|                               |                         | R:                     | ATGTGGTCTTCCTGAATCCCT  |
| <i>qRT-PCR</i>                |                         |                        |                        |
| Camp                          | NM_009921.2             | F:                     | TCCCAAGTCTGTGAGGTTCC   |
|                               |                         | R:                     | AGGCACATTGCTCAGGTAGC   |
| Cpt1c                         | NM_153679.2             | F:                     | TCTTCACTGAGTTCCGATGGG  |
|                               |                         | R:                     | ACGCCAGAGATGCCTTTTCC   |
| Defb2                         | NM_010030.1             | F:                     | CCACACCAATGGAGGGTACT   |
|                               |                         | R:                     | AGGGGTCTTCTCTGGGAAA    |
| Defb3                         | NM_013756.2             | F:                     | ATTTCTCCTGGTGCTGCTGT   |
|                               |                         | R:                     | TCCACAACCTGCCAATCTGAC  |
| Ifng                          | NM_008337.3             | F:                     | AGCTGCCATCGGCTGACCTA   |
|                               |                         | R:                     | CCGCAGGAGGAGAAGCCCAGA  |
| Il1b                          | NM_008361.3             | F:                     | GAAGAGCCCATCCTCTGTGA   |
|                               |                         | R:                     | TCCATTGAGGTGGAGAGCTT   |
| Il4                           | NM_021283.2             | F:                     | TGTACCAGGAGCCATATCCAC  |
|                               |                         | R:                     | CACCTTGGAAGCCCTACAGA   |
| Il6                           | NM_031168.1             | F:                     | GGACTGATGCTGGTGACAAC   |
|                               |                         | R:                     | TCCACGATTTCCCAGAGAAC   |
| Il10                          | NM_010548.2             | F:                     | GCTAACCGACTCCTTAATGCAG |
|                               |                         | R:                     | AGCTTCTCACCCAGGGAATT   |

| Gene symbol | Accession number | Primer sequence |                         |
|-------------|------------------|-----------------|-------------------------|
| Il13        | NM_008355.3      | F:              | CTCAGCCTGCACTGCCTGCC    |
|             |                  | R:              | GCTCAAGCTGCTGCCTGCCT    |
| Il17a       | NM_010552.3      | F:              | CTACCTCAACCGTTCCACGT    |
|             |                  | R:              | AGCTCTCAGGCTCCCTCTTC    |
| Il17e       | NM_080729.3      | F:              | CAGTCCCAGTGACGCTAGAC    |
|             |                  | R:              | ACCCACTAGAGCGGTGAGAG    |
| Il17f       | NM_145856.2      | F:              | TGCTACTGTTGATGTTGGGAC   |
|             |                  | R:              | AATGCCCTGGTTTTGGTTGAA   |
| Pdk4        | NM_013743.2      | F:              | AGGGAGGTCGAGCTGTTCTC    |
|             |                  | R:              | GGAGTGTTCACTAAGCGGTCA   |
| Pltp        | NM_011125.2      | F:              | TGCTGAACATCTCCAACGCAT   |
|             |                  | R:              | CACTTTAATCCGACCACTGGAAT |
| Ppara       | NM_001113418.1   | F:              | GCTGAAGCTGGTGTACGACA    |
|             |                  | R:              | TGCCCAGAGATTTGAGGTCT    |
| Pparg       | NM_001127330.1   | F:              | CACCAACTTCGGAATCAGCT    |
|             |                  | R:              | AACCATTGGGTCAGCTCTTG    |
| Reg3g       | NM_011260.1      | F:              | GCCCTCAGGACATCTTGTGT    |
|             |                  | R:              | ACTCCCATCCACCTCTGTTG    |
| Rorc        | NM_011281.2      | F:              | GAACCAGAACAGGGTCCAGA    |
|             |                  | R:              | CGTAGAAGGTCCTCCAGTCG    |
| S100a8      | NM_013650.2      | F:              | TCACCATGCCCTCTACAAGA    |
|             |                  | R:              | GAGATGCCACACCCACTTTT    |
| S100a9      | NM_001281852.1   | F:              | ACACCCTGAGCAAGAAGGAA    |
|             |                  | R:              | GTCCAGGTCCCTCCATGATGT   |
| Tgfb1       | NM_011577.1      | F:              | TTGCTTCAGCTCCACAGAGA    |
|             |                  | R:              | TGGTTGTAGAGGGCAAGGAC    |
| Tnf         | NM_001278601.1   | F:              | ACGGCATGGATCTCAAAGAC    |
|             |                  | R:              | GTGGGTGAGGAGCACGTAGT    |

1. **Wang, F., J. Wang, D. Liu, and Y. Su.** 2010. Normalizing genes for real-time polymerase chain reaction in epithelial and nonepithelial cells of mouse small intestine. *Anal Biochem* **399**:211-217.
